# Supplementary material
Source: publisher figshare collection journal article supplement (https://frontiersin.figshare.com/ndownloader/files/12359138)
Supplement: Supplementary file [file 12359138]

---

## Supplementary Material

### Immune Landscape of CRC Tumor Microenvironment from Different Primary Tumor Location

Longhui Zhang<sup>1</sup>, Yuetao Zhao<sup>1</sup>, Ying Dai<sup>1</sup>, Jia-Nan Cheng<sup>1</sup>, Zhihua Gong<sup>1</sup>, Yi Feng<sup>1</sup>,

Chengdu Sun<sup>1</sup>, Qingzhu Jia<sup>1\*</sup>, Bo Zhu<sup>1, 2\*</sup>

**Figure S1. Cytotoxic function for high, median, and low immune infiltration among non-rectal tumors clustered on the basis of immune cell infiltration.**

**Figure S2. The relation between immune infiltration and *EGFR*, *BRAF*, *KRAS* and *TP53* mutation status.**

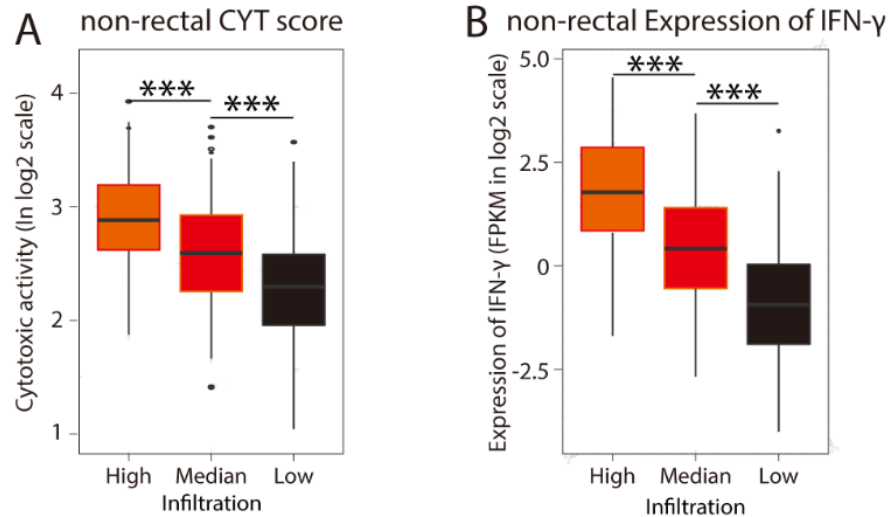

**Figure S1. Cytotoxic function for high, median, and low immune infiltration among non-rectal tumors clustered on the basis of immune cell infiltration.**

**(A)**Relative cytolytic score (CYT), and **(B)**expression of IFN- $\gamma$  for high, median, and low immune infiltration among non-rectal tumors clustered by overall immune cell infiltration. Two-tailed Student's t-tests were used for all analyses. The error bars represent the means  $\pm$  SEM. \* $p < 0.05$ ; \*\* $p < 0.01$ ; \*\*\* $p < 0.001$ ;  $p \geq 0.05$ , not significant.

|                    |          |          |                     |          |          |
|--------------------|----------|----------|---------------------|----------|----------|
| A $p_{EGFR}=0.045$ |          |          | B $p_{BRAF}=0.0008$ |          |          |
| EGFR               | Mutation | Wildtype | BRAF                | Mutation | Wildtype |
| High               | 26       | 169      | High                | 47       | 158      |
| Median             | 36       | 235      | Median              | 54       | 214      |
| Low                | 24       | 148      | Low                 | 14       | 151      |

  

|                    |          |          |                     |          |          |
|--------------------|----------|----------|---------------------|----------|----------|
| C $p_{KRAS}=0.499$ |          |          | D $p_{TP53}=0.5660$ |          |          |
| KRAS               | Mutation | Wildtype | TP53                | Mutation | Wildtype |
| High               | 75       | 139      | High                | 120      | 130      |
| Median             | 93       | 168      | Median              | 137      | 124      |
| Low                | 66       | 97       | Low                 | 89       | 83       |

**Figure S2. The relation between immune infiltration and *EGFR*, *BRAF*, *KRAS* and *TP53* mutation status.**

(A) The degree of immune infiltration in *EGFR* wild type is higher than *EGFR* mutation (H=169; M=235; L=148 vs H=26; M=36; L=24,  $p=0.045$ ). (B) The same to *BRAF* genotype, wild type is higher than mutation (H=158; M=214; L=151 vs H=47; M=54; L=14,  $p=0.0008$ ). (C, D) The relationship between *KRAS* and *TP53* mutation status and immune cell infiltration are negative.
